# Supplementary material
Source: MDPI journal article supplement (https://www.mdpi.com/2072-4292/14/12/2757)
Supplement: s1 [file s1 › remotesensing-1717303-supplementary.pdf]

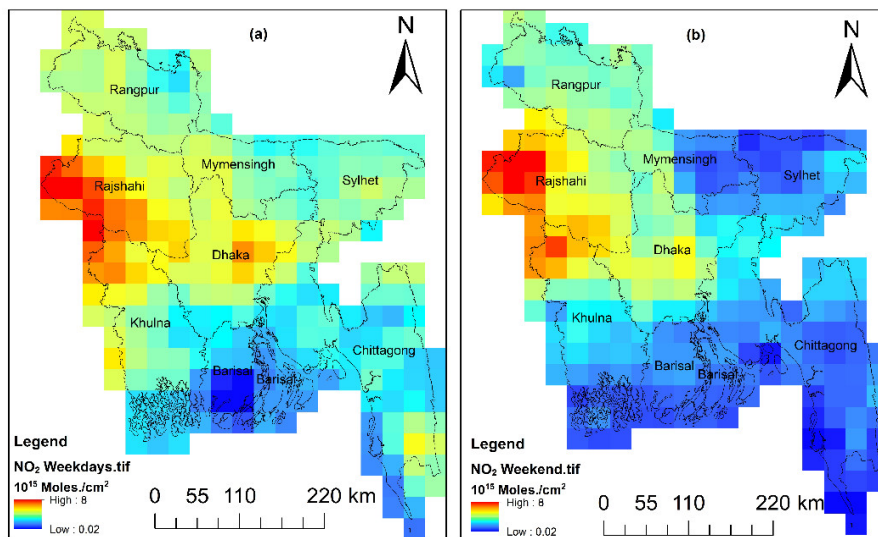

**Figure S1.** The NO<sub>2</sub> distribution over the study area: (a) in weekdays, and (b) in weekends.

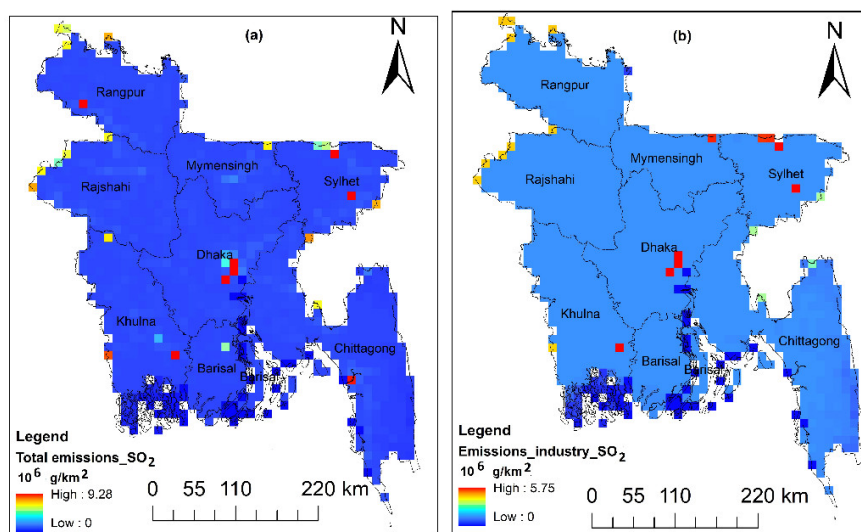

**Figure S2.** The emission inventory of SO<sub>2</sub> over the study area: (a) the total emissions, and (b) the industry emissions.

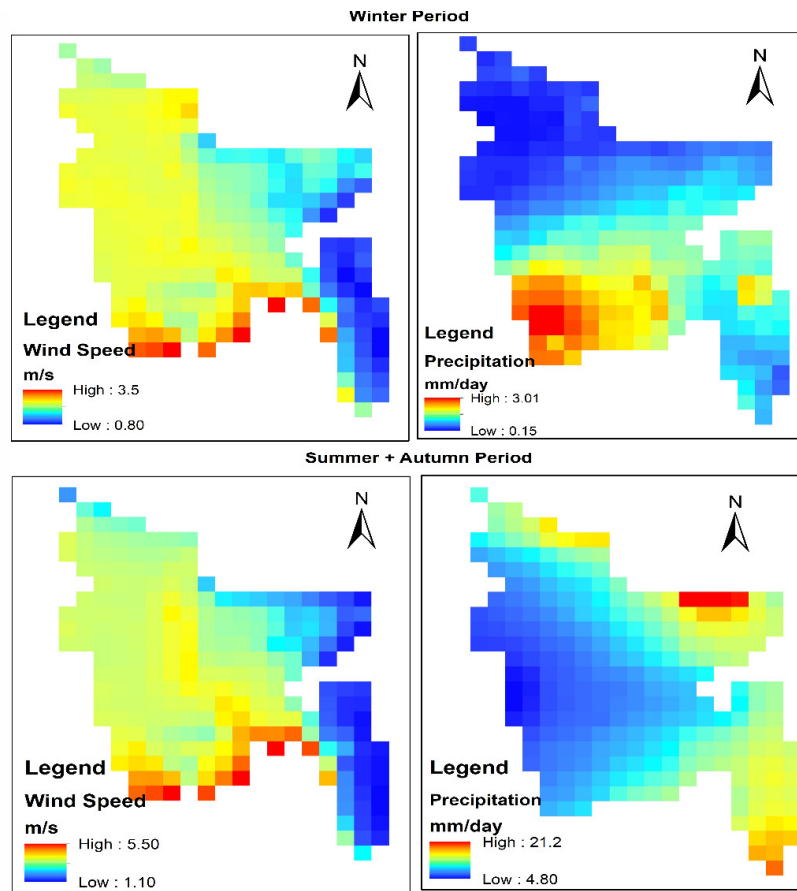

**Figure S3.** The spatial distribution of wind speed and precipitation during winter and rest of the period: the first column of the figure represents the dry deposition and the second one for wet deposition.

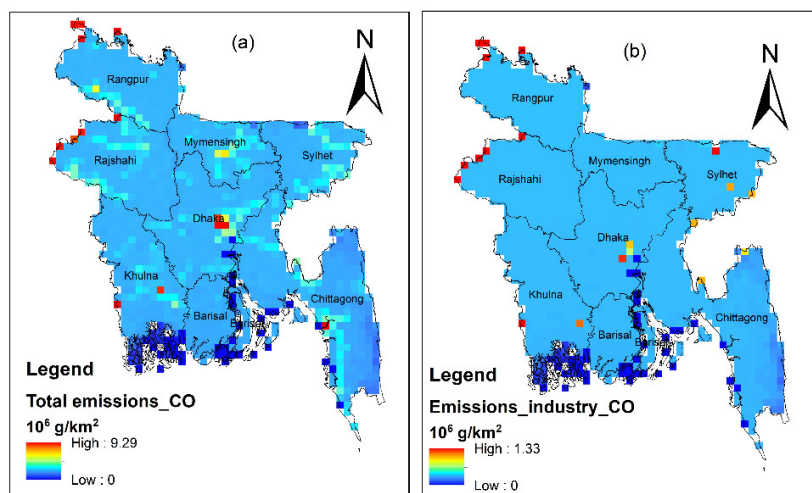

**Figure S4.** The emission inventory of CO over the study area: (a) the total emissions, and (b) the industry emissions.
